# Supplementary material
Source: publisher site journal article supplement (https://www.spandidos-publications.com/788/downloadSupplementary)

Figure S1. ASB. (A) Andrographolide is a bioactive constituent extracted from *Andrographis paniculata* (Burm. f.) Nees, and ASB is a soluble derivative composed of andrographolide and sodium bisulfate. (B) High-performance liquid chromatography chromatogram of ASB (purity >98%). ASB, andrographolide sodium bisulfate.

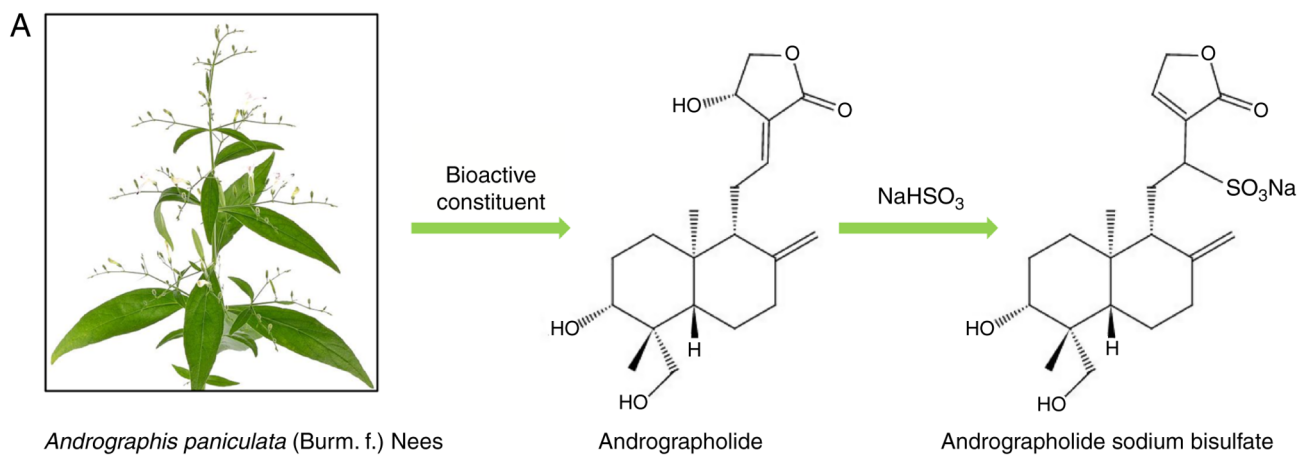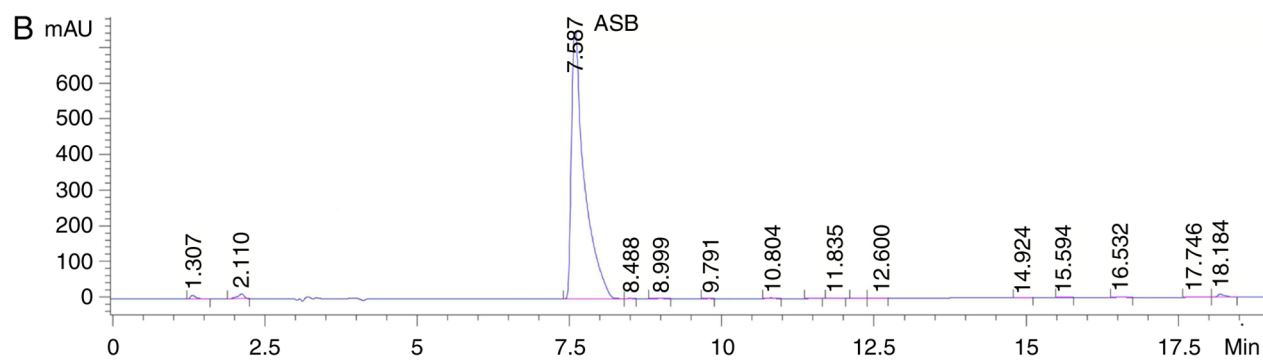

Supplement: Supplementary file 1 [file downloadSupplementary]
